# Supplementary material for: Alternative splicing liberates a cryptic cytoplasmic isoform of mitochondrial MECR that antagonizes influenza virus
Source: PubMed Central journal article supplement (PMC9815647; doi:10.1371/journal.pbio.3001934), 2022-12-21
Supplement: pbio.3001934.s009.pdf [file pbio.3001934.s009.pdf]

**Supp. Table 3.** Statistical analysis<sup>a</sup> of influenza infection siRNA screens

| siRNA target | Fig. 2a-b <sup>b</sup> |                  | Supp. Fig. 2a-b <sup>c</sup> |                  | Supp Fig. 2c-d <sup>d</sup> |                  |
|--------------|------------------------|------------------|------------------------------|------------------|-----------------------------|------------------|
|              | <i>P</i> value         | sig <sup>e</sup> | <i>P</i> value               | sig <sup>e</sup> | <i>P</i> value              | sig <sup>e</sup> |
| NXF1         | 0.003                  | **               | <0.0001                      | ****             | <0.0001                     | ****             |
| ABLIM1       | 0.0932                 |                  | 0.0013                       | **               | 0.2818                      |                  |
| ADAR         | 0.7809                 |                  | 0.2433                       |                  | 0.6918                      |                  |
| ALDH18A1     | 0.2871                 |                  | 0.1801                       |                  | 0.1555                      |                  |
| ANP32A       | 0.4756                 |                  | 0.1942                       |                  | 0.5698                      |                  |
| ATP7A        | 0.7944                 |                  | <0.0001                      | ****             | 0.5782                      |                  |
| CCDC47       | 0.4571                 |                  | 0.4107                       |                  | 0.014                       | *                |
| EPB41L1      | 0.251                  |                  | 0.1353                       |                  | 0.5914                      |                  |
| EPDR1        | 0.1315                 |                  | <0.0001                      | ****             | 0.4658                      |                  |
| EWSR1        | 0.2701                 |                  | <0.0001                      | ****             | 0.0986                      |                  |
| FUS          | 0.4095                 |                  | 0.0205                       | *                | 0.9769                      |                  |
| GMPS         | 0.9369                 |                  | 0.0337                       | *                | 0.5055                      |                  |
| GPD2         | 0.1871                 |                  | <0.0001                      | ****             | 0.8706                      |                  |
| HNRNPUL1     | 0.0319                 | *                | 0.0363                       | *                | <0.0001                     | ****             |
| KPNA3        | 0.3599                 |                  | 0.0067                       | **               | 0.4731                      |                  |
| KPNA4        | 0.0906                 |                  | <0.0001                      | ****             | 0.4336                      |                  |
| LGALS3BP     | 0.7595                 |                  | 0.0003                       | ***              | 0.4312                      |                  |
| MECR         | <0.0001                | ****             | 0.0013                       | **               | <0.0001                     | ****             |
| MRTO4        | 0.9697                 |                  | 0.0045                       | **               | 0.9172                      |                  |
| SHROOM2      | 0.7592                 |                  | 0.0054                       | **               | 0.93                        |                  |
| SMCHD1       | 0.7206                 |                  | 0.1106                       |                  | 0.5983                      |                  |
| SNTG1        | 0.5135                 |                  | <0.0001                      | ****             | 0.3284                      |                  |
| SRSF2        | 0.459                  |                  | <0.0001                      | ****             | 0.2338                      |                  |
| TMEM106B     | 0.7947                 |                  | 0.0562                       |                  | <0.0001                     | ****             |
| TPR          | 0.3615                 |                  | <0.0001                      | ****             | 0.047                       | *                |
| TRIM21       | 0.4499                 |                  | 0.0007                       | ***              | 0.1607                      |                  |

a, Two-way ANOVA followed by Fisher's LSD test

b, A549 multicycle

c, 293T multicycle

d, A549 single cycle

e, \*\*\*\*,  $P < 0.0001$ ; \*\*\*,  $P < 0.001$ ; \*\*,  $P < 0.01$ ; \*,  $P < 0.05$
