# Supplementary material for: Alternative splicing liberates a cryptic cytoplasmic isoform of mitochondrial MECR that antagonizes influenza virus
Source: PubMed Central journal article supplement (PMC9815647; doi:10.1371/journal.pbio.3001934), 2022-12-21
Supplement: pbio.3001934.s010.pdf [file pbio.3001934.s010.pdf]

**Supp. Table 4.** Accession numbers for MECR homologs

| Common Name          | Species                      | MECR <sup>a</sup> | cMECR <sup>a</sup> |
|----------------------|------------------------------|-------------------|--------------------|
| Human                | Homo sapiens                 | NP_057095.4       | NP_001336643.1     |
| Chimpanzee           | Pan paniscus                 | XP_003828155.1    | XP_034815583.1     |
| Gorilla              | Gorilla gorilla gorilla      | XP_004025368.3    | XP_018869404.1     |
| Rhesus macaque       | Macaca mulatta               | NP_001248098.1    | XP_014988731.1     |
| Pale spear-nosed bat | Phyllostomus discolor        | XP_028368816.1    |                    |
| American bison       | Bison bison bison            | XP_010828514.1    |                    |
| Cow                  | Bos taurus                   | NP_858055.1       | XP_024855139.1     |
| Pig                  | Sus scrofa                   | NP_001231011.1    | XP_020949000.1     |
| Horse                | Equus caballus               | XP_001503984.3    |                    |
| Beluga whale         | Delphinapterus leucas        | XP_022407680.2    |                    |
| Camel                | Camelus ferus                | XP_006175527.1    | XP_032351592.1     |
| Alpaca               | Vicugna pacos                | XP_031539466.1    |                    |
| Mouse                | Mus musculus                 | NP_079573.2       | XP_036020031.1     |
| Chicken              | Gallus gallus                | XP_024998883.1    |                    |
| Goose                | Anser cygnoides domesticus   | XP_013050980.1    | XP_013050980.1     |
| Duck                 | Anas platyrhynchos           | XP_027299737.1    |                    |
| Saker falcon         | Falco cherrug                | XP_027668811.1    | XP_005433096.1     |
| Golden eagle         | Aquila chrysaetos chrysaetos | XP_029895600.1    | XP_029895602.1     |
| Alligator            | Alligator mississippiensis   | KYO48103.1        | XP_019344297.1     |
| Salmon               | Salmo salar                  | XP_014055905.1    |                    |
| Trout                | Salmo trutta                 | XP_029592657.1    |                    |
| Zebrafish            | Danio rerio                  | AAI53449.1        |                    |
| Frog                 | Xenopus tropicalis           | NP_001016371.1    | XP_012812419.1     |
| Slime mold           | Dictyostelium fasciculatum   | XP_004362847.1    |                    |
| Nematode             | Trichinella spiralis         | XP_003380885.1    |                    |
| Baker's yeast        | Saccharomyces cerevisiae     | NP_009582.1       |                    |

a, NCBI Reference Sequence ID
